# Supplementary material for: Construction of eight mixed-valence pentanuclear CuI4CuII clusters using ligands with inhomogeneous electron density distribution: synthesis, characterization and photothermal properties
Source: Royal Society of Chemistry journal article supplement (doi:10.1039/d2dt00658h), 2022-01-01
Supplement: d2dt00658h1.pdf [file d2dt00658h1.pdf]

## **Supporting Information**

# **Title: Construction of Eight Mixed-Valence Pentanuclear $\text{Cu}^{\text{I}}_4\text{Cu}^{\text{II}}$ Clusters by Using the Ligands with Inhomogeneous Electron Density Distribution: Synthesis, Characterization and Photothermal Properties**

Authors: Zi-Xuan Yao,<sup>[a]</sup> Jing-Zhe Li,<sup>[a]</sup> Hao-Hai Wang,<sup>[a]</sup> Xun Cheng,<sup>[a]</sup> Lin-Lin Hou,<sup>[a]</sup> Dong-Nan Yu,<sup>[a]</sup> Delun Chen,<sup>\*[b]</sup> Wen-Yan Dan,<sup>[c]</sup> and Kuan-Guan Liu,<sup>\*[a]</sup>

\* *Dr. Delun Chen*  
*E-mail: [chendelun2014@163.com](mailto:chendelun2014@163.com)*

\* *Dr. Kuan-Guan Liu*  
*E-mail: [liukuanguan@nxu.edu.cn](mailto:liukuanguan@nxu.edu.cn)*

<sup>[a]</sup>*State Key Laboratory of High-efficiency Coal Utilization and Green Chemical Engineering, and Key Laboratory of Ningxia for Photovoltaic Materials, Ningxia University, Yin-Chuan, 750021, China*

<sup>[b]</sup>*State Key Laboratory of Marine Resource Utilization in South China Sea, College of Materials Science and Engineering, Hainan University, Haikou 570228, China*

<sup>[c]</sup>*School of Chemical Science & Engineering, Tongji University, Shanghai 200092, China.*

## Characterization

### Figures:

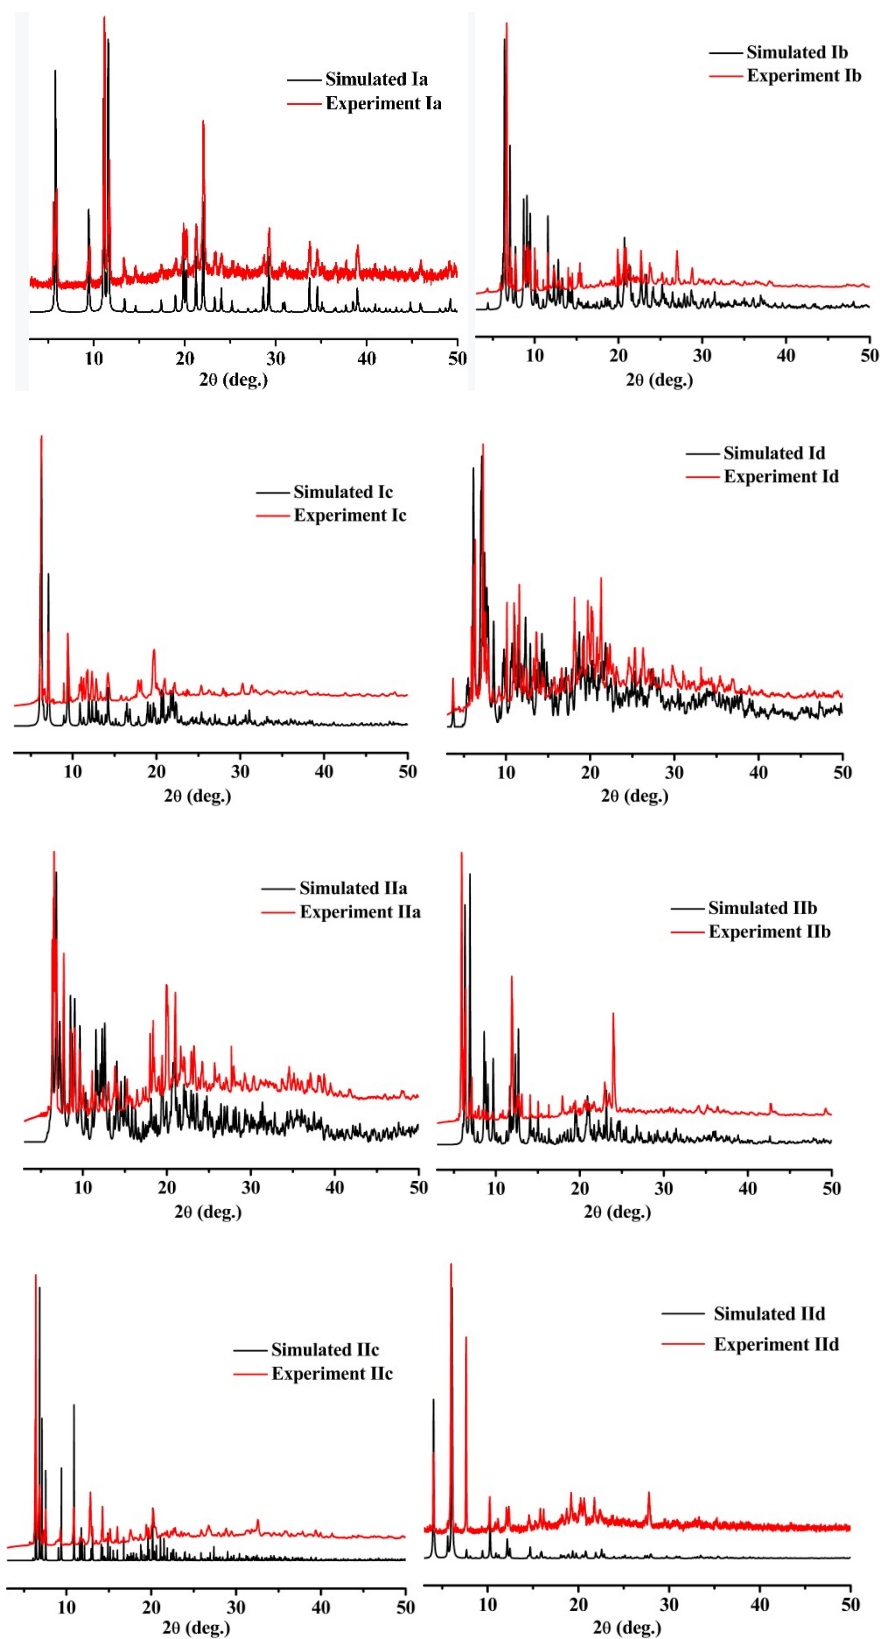

Figure S1. The powder XRD patterns of all clusters.

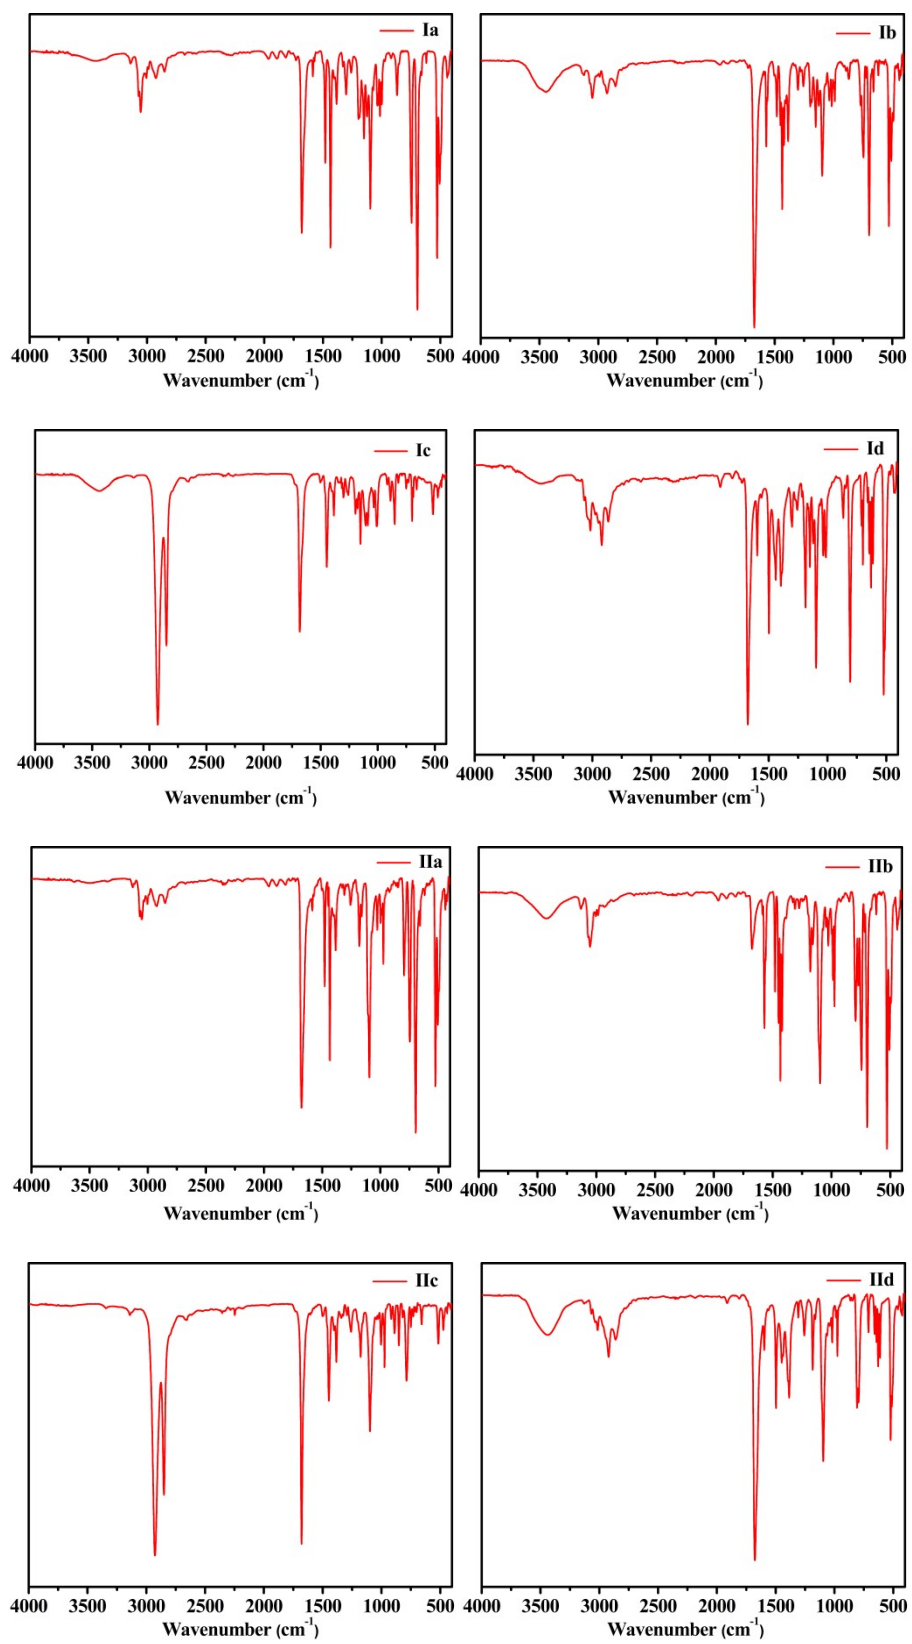

**Figure S2.** The IR spectra of all clusters.

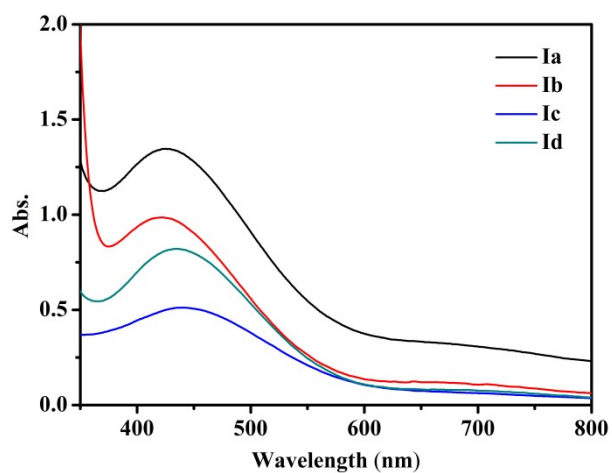

**Figure S3.** The UV spectra of clusters **Ia~d**.

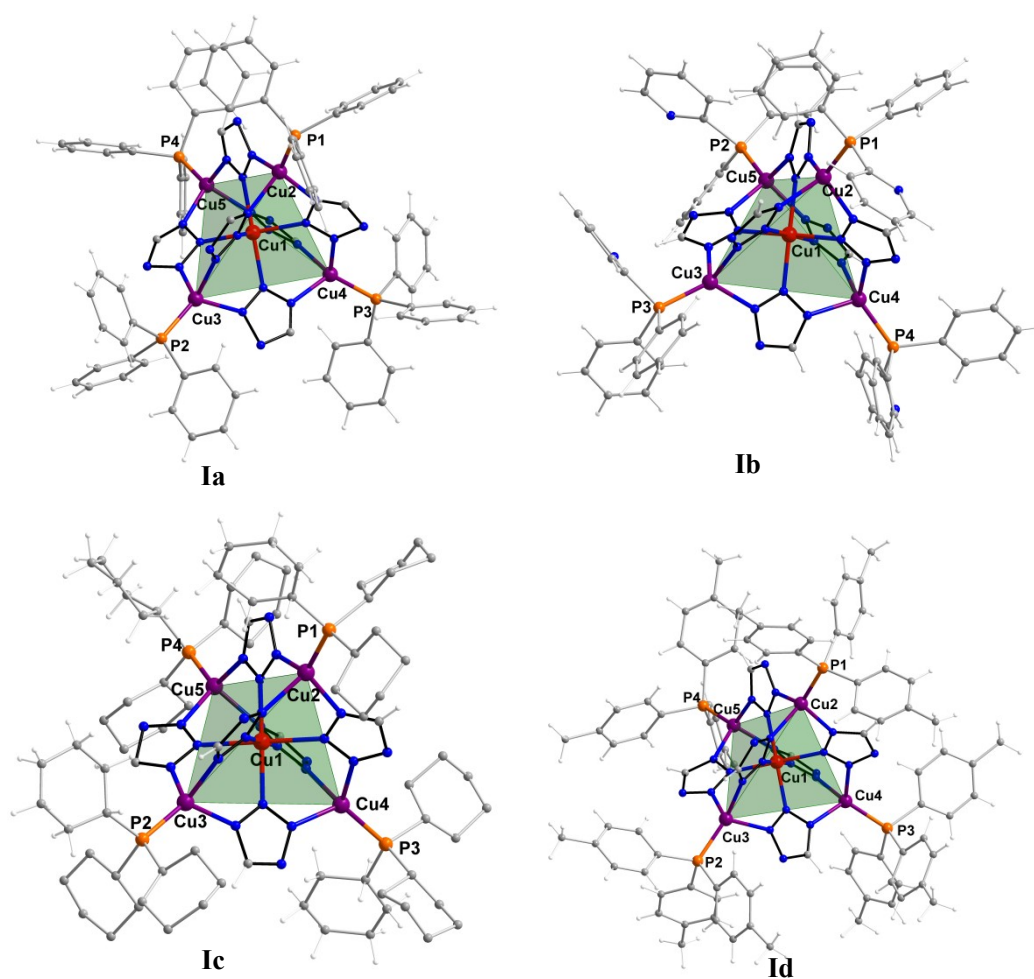

**Figure S4.** Crystal structures of **Ia~Id**. Color code: Cu<sup>II</sup>, red; Cu<sup>I</sup>, purple; Phosphines, golden; C, grey; N, blue; Pentanuclear Cu<sub>4</sub>Cu<sup>II</sup> unit, cyan tetrahedron; five-membered rings are highlighted in black. The disorder parts and the solvent molecules are omitted for clarity.

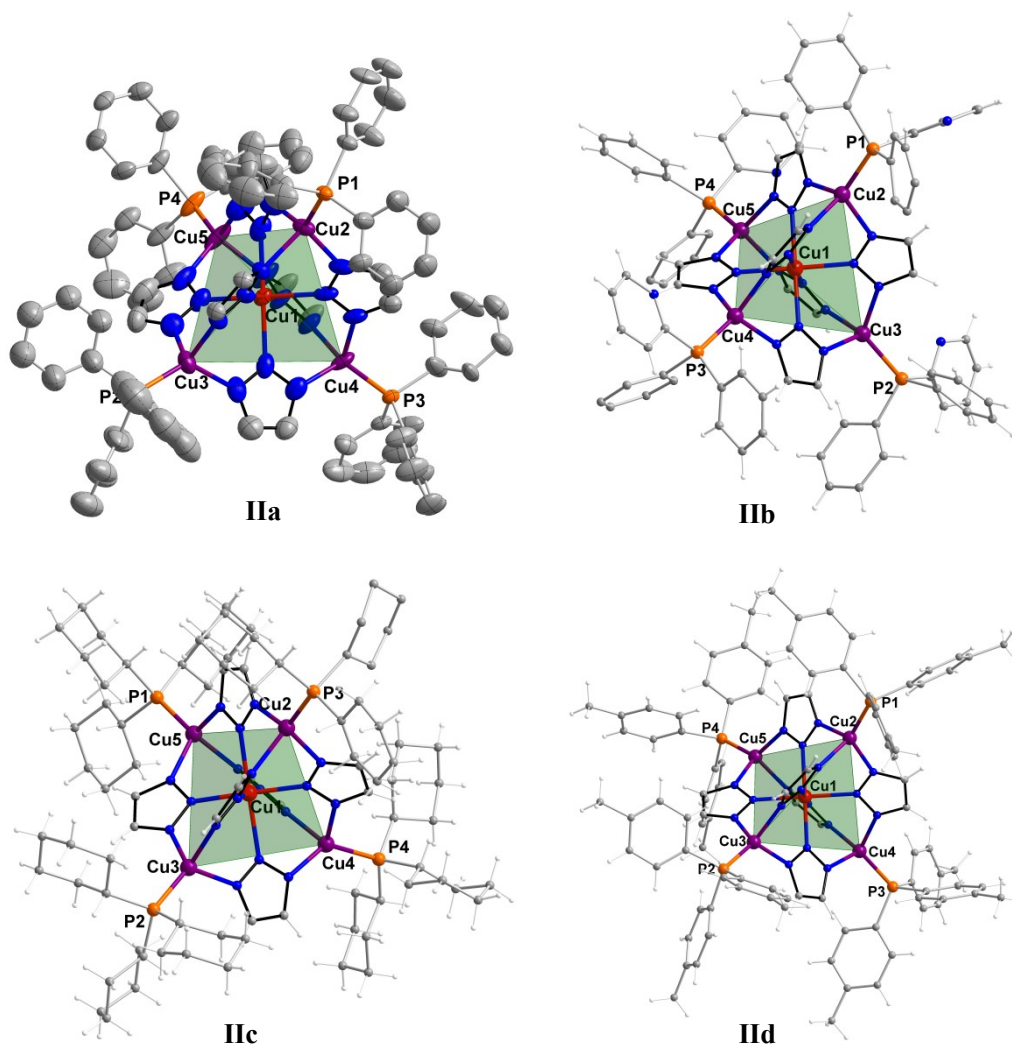

**Figure S5.** Crystal structures of **IIa~IIId**. Color code: Cu<sup>II</sup>, red; Cu<sup>I</sup>, purple; Phosphines, golden; C, grey; N, blue; Pentanuclear Cu<sup>I</sup><sub>4</sub>Cu<sup>II</sup> unit, cyan tetrahedron; five-membered rings are highlighted in black. The disorder parts and the solvent molecules are omitted for clarity.

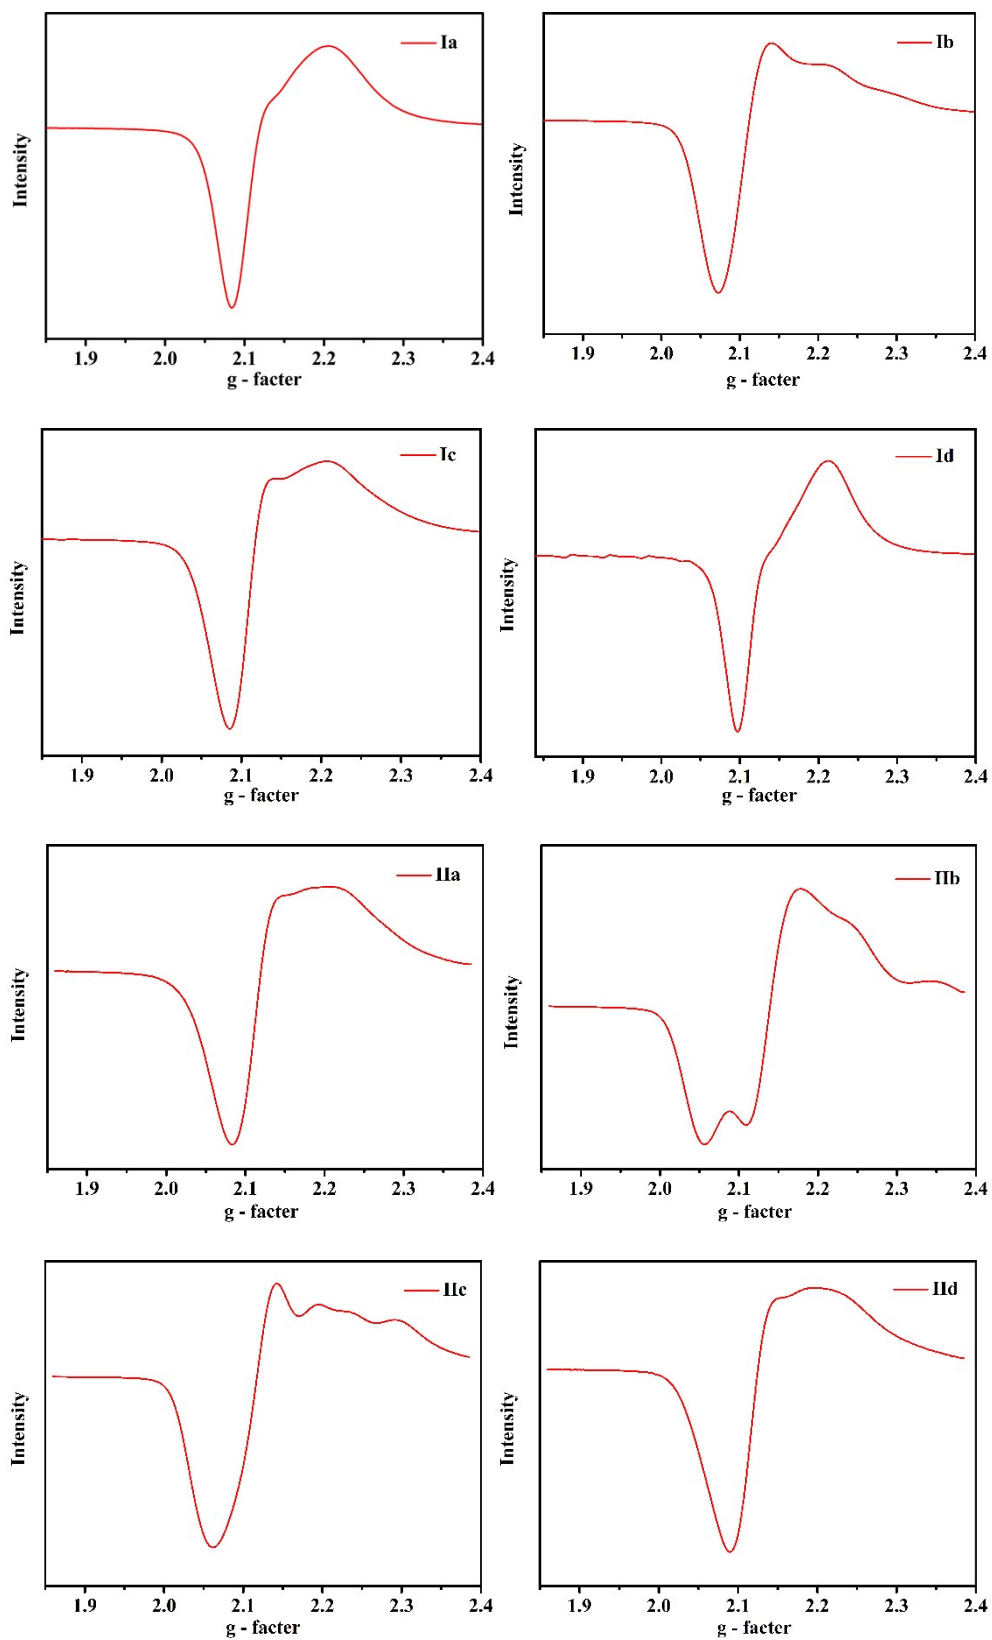

**Figure S6.** The EPR spectra of all clusters.

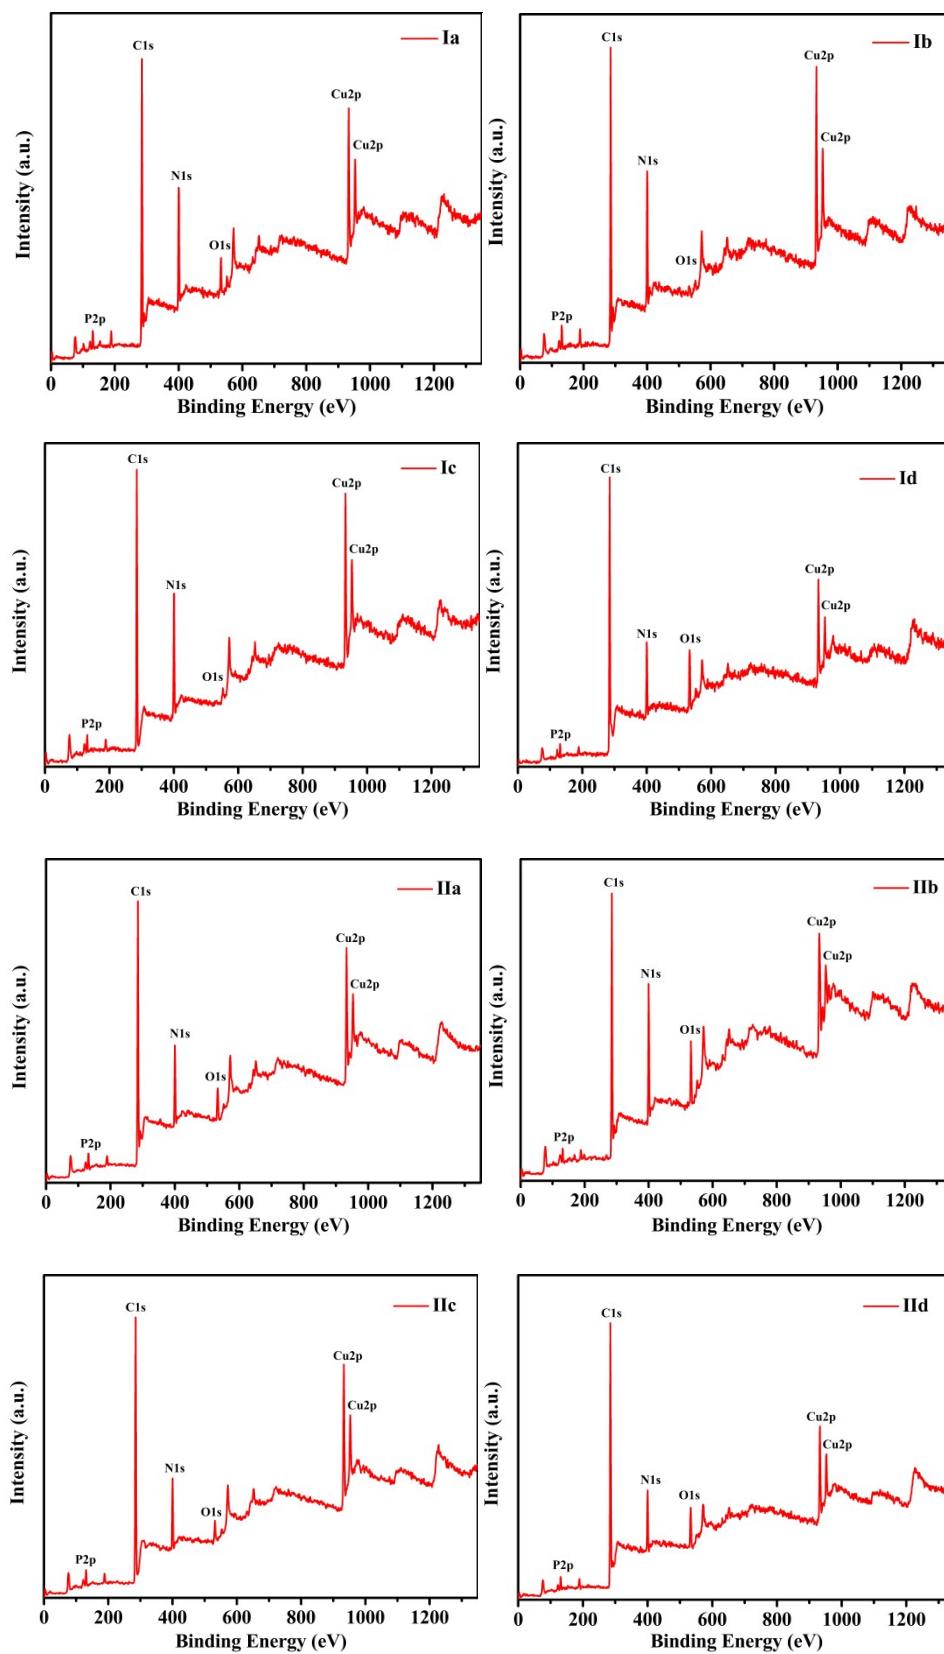

**Figure S7.** The XPS spectra of all clusters.

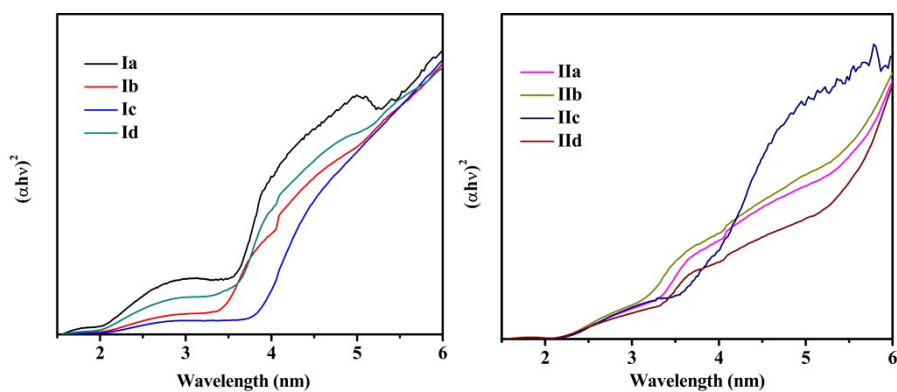

Figure S8. The solid UV-vis diffuse reflectance spectra of **Ia~d** and **IIa~d**.

### Compound Ia

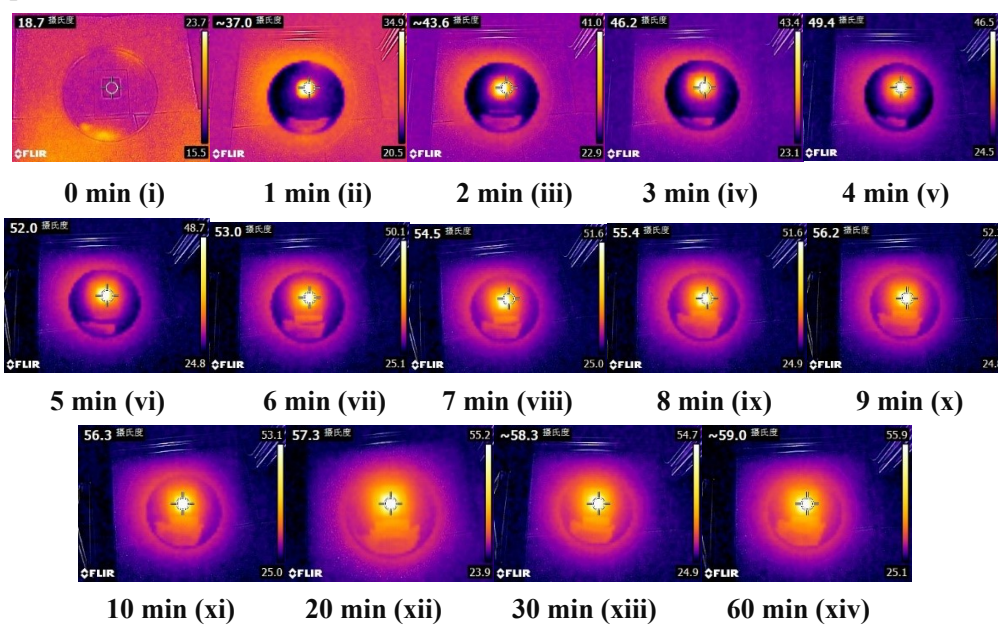

### Compound Ib

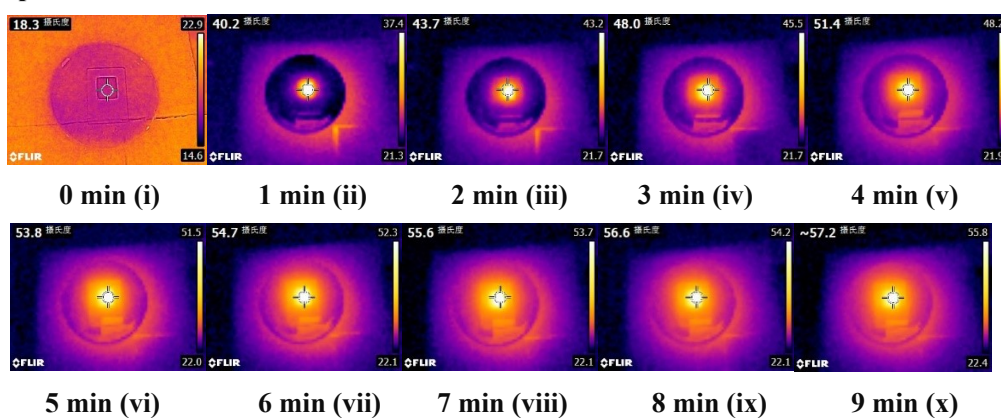



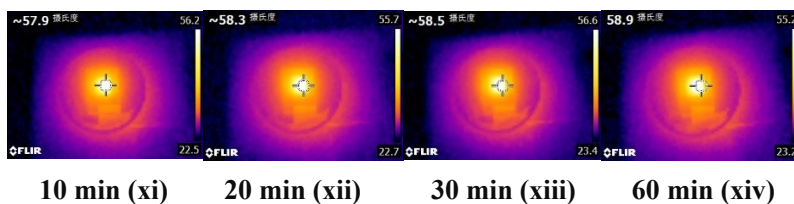

**Compound Ic**

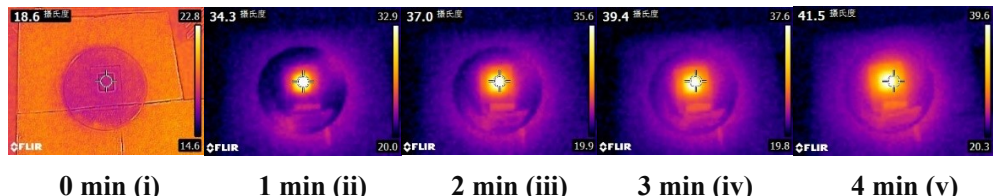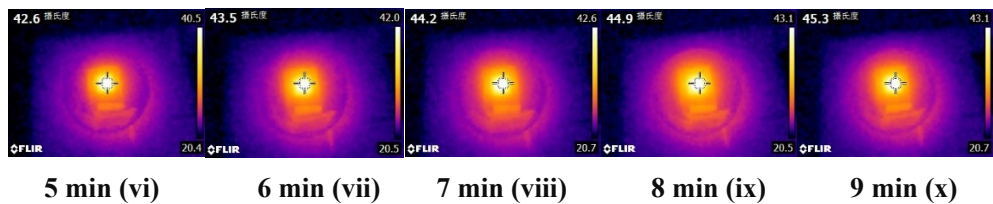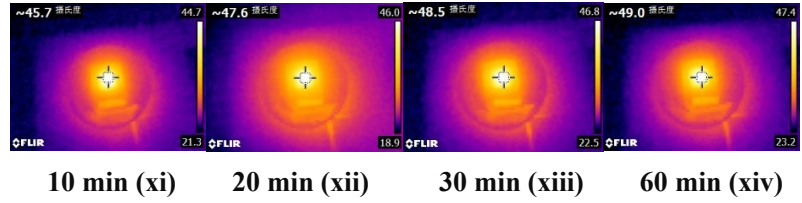

**Compound Id**

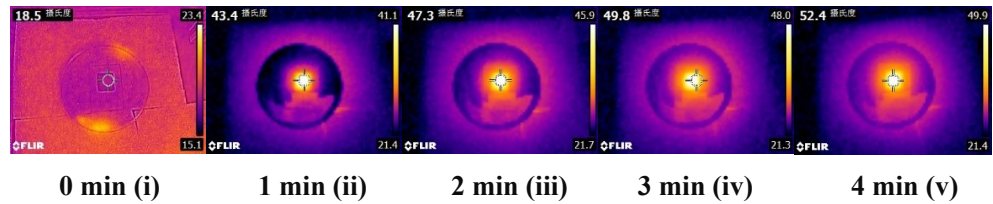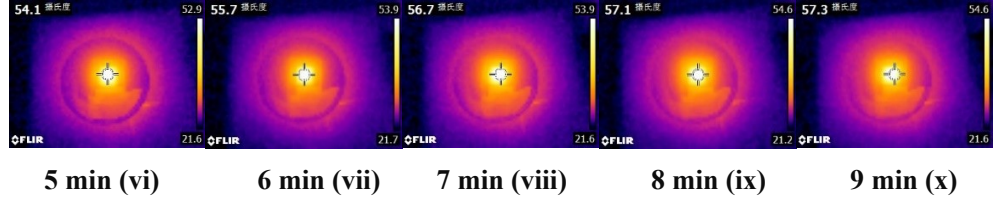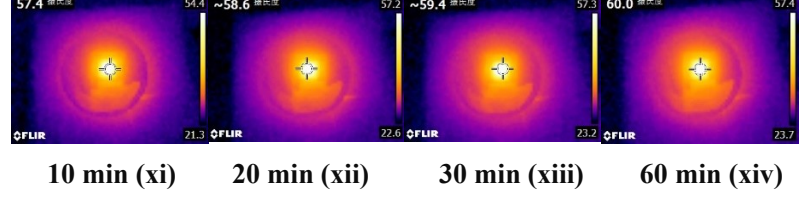

**Compound IIa**

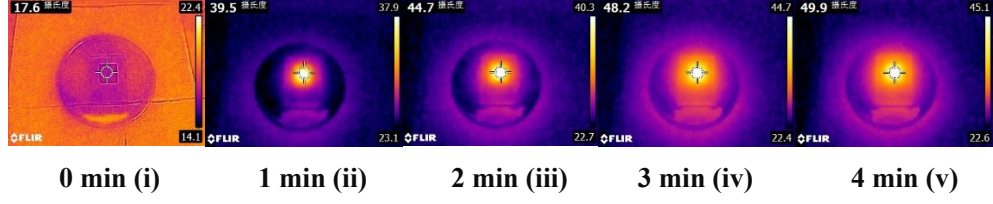

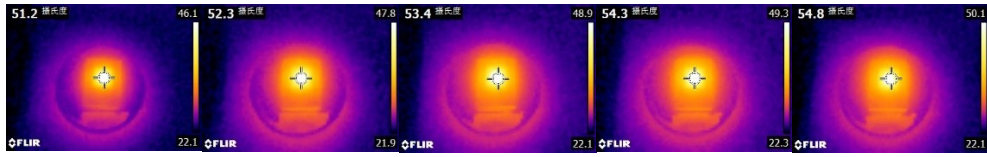

5 min (vi)      6 min (vii)      7 min (viii)      8 min (ix)      9 min (x)

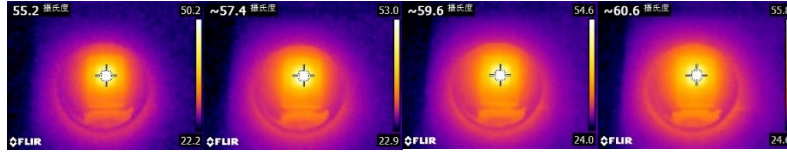

10 min (xi)      20 min (xii)      30 min (xiii)      60 min (xiv)

**Compound IIb**

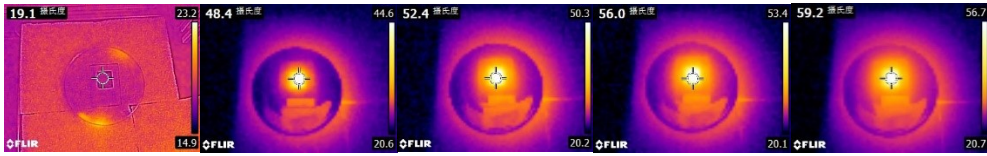

0 min (i)      1 min (ii)      2 min (iii)      3 min (iv)      4 min (v)

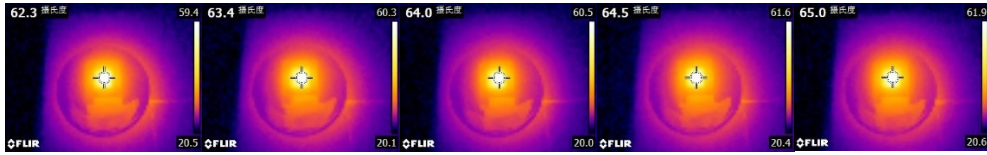

5 min (vi)      6 min (vii)      7 min (viii)      8 min (ix)      9 min (x)

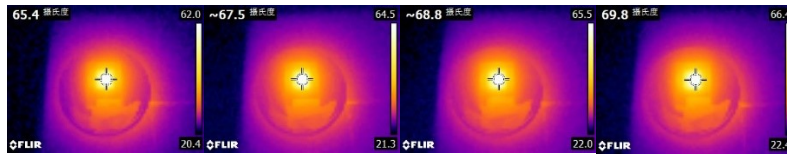

10 min (xi)      20 min (xii)      30 min (xiii)      60 min (xiv)

**Compound IIc**

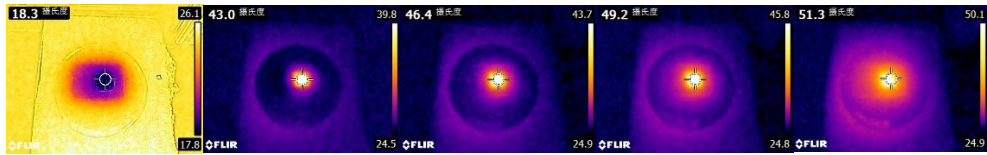

0 min (i)      1 min (ii)      2 min (iii)      3 min (iv)      4 min (v)

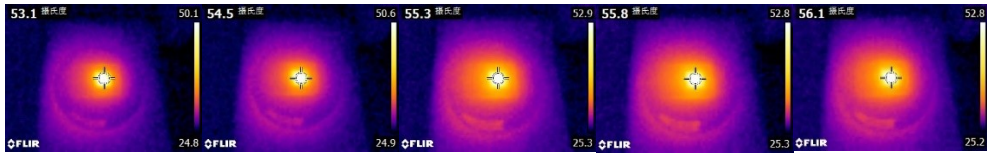

5 min (vi)      6 min (vii)      7 min (viii)      8 min (ix)      9 min (x)

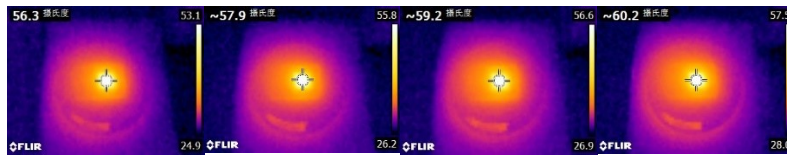

10 min (xi)      20 min (xii)      30 min (xiii)      60 min (xiv)

**Compound IId**

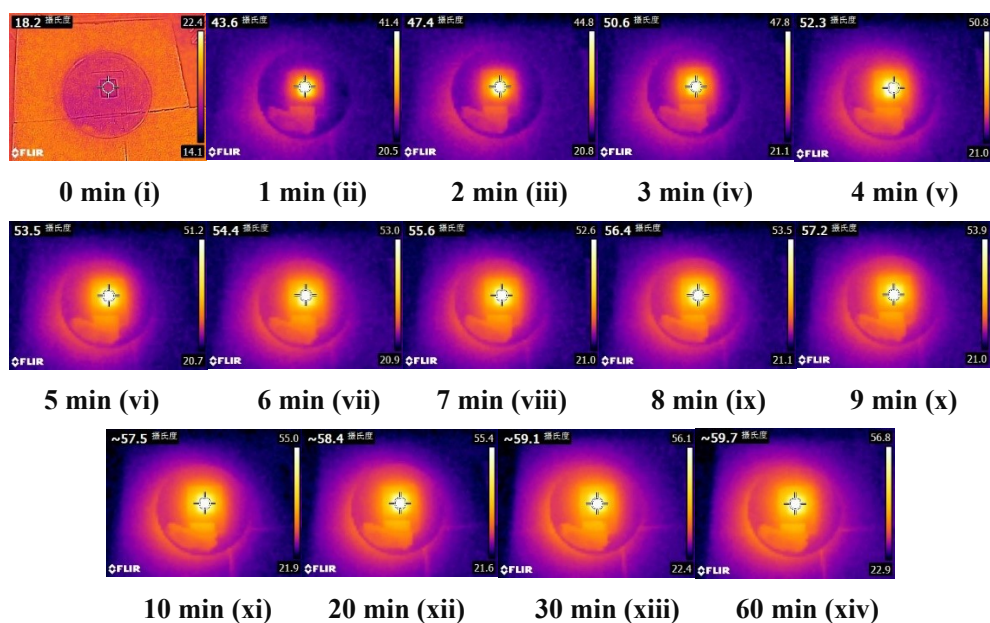

**Figure S9.** The tracking thermal pictures of samples **Ia~d** and **IIa~d**.

### Tables:

**Table S1.** The XPS value of the assignments of the Cu 2P in clusters **Ia ~ d** and **IIa ~ d**.

| Sample                             | Ia    | Ib    | Ic    | Id    | IIa   | IIb   | IIc   | IId   |
|------------------------------------|-------|-------|-------|-------|-------|-------|-------|-------|
| Cu <sup>1</sup> 2p <sup>3/2</sup>  | 932.8 | 932.8 | 932.9 | 932.8 | 932.6 | 932.5 | 932.8 | 932.5 |
| Cu <sup>1</sup> 2p <sup>1/2</sup>  | 952.7 | 952.7 | 952.6 | 952.7 | 952.5 | 952.4 | 952.6 | 952.5 |
| Cu <sup>11</sup> 2p <sup>3/2</sup> | 935.1 | 935.0 | 935.2 | 935.3 | 935.0 | 935.3 | 935.0 | 934.9 |
| Cu <sup>11</sup> 2p <sup>1/2</sup> | 955.0 | 954.6 | 955.2 | 955.4 | 955.2 | 955.2 | 954.7 | 955.2 |

**Table S2.** The surface temperature of samples **Ia ~ d** and **IIa ~ d** changes with time.

| Sample                        | Ia   | Ib   | Ic   | Id   | IIa  | IIb  | IIc  | IId  |
|-------------------------------|------|------|------|------|------|------|------|------|
| <b>0 min</b>                  | 18.7 | 18.3 | 18.6 | 18.5 | 17.6 | 19.1 | 18.3 | 18.2 |
| <b>1 min</b>                  | 37.0 | 40.2 | 34.3 | 43.4 | 39.5 | 48.4 | 43.0 | 43.6 |
| <b>2 min</b>                  | 43.6 | 43.7 | 37.0 | 47.3 | 44.7 | 52.4 | 46.4 | 47.4 |
| <b>3 min</b>                  | 46.2 | 48.0 | 39.4 | 49.8 | 48.2 | 56.0 | 49.2 | 50.6 |
| <b>4 min</b>                  | 49.4 | 51.4 | 41.5 | 52.4 | 51.2 | 59.2 | 51.3 | 52.3 |
| <b>5 min</b>                  | 52.0 | 53.8 | 42.6 | 54.1 | 52.3 | 62.3 | 53.1 | 53.5 |
| <b>6 min</b>                  | 53.0 | 54.7 | 43.5 | 55.7 | 53.4 | 63.4 | 54.5 | 54.4 |
| Temperature (°C) <b>7 min</b> | 54.5 | 55.6 | 44.2 | 56.7 | 54.3 | 64.0 | 55.3 | 55.6 |
| <b>8 min</b>                  | 55.4 | 56.6 | 44.9 | 57.1 | 54.8 | 64.5 | 55.8 | 56.4 |
| <b>9 min</b>                  | 56.2 | 57.2 | 45.3 | 57.3 | 55.2 | 65.0 | 56.1 | 57.2 |

|               |      |      |      |      |      |      |      |      |
|---------------|------|------|------|------|------|------|------|------|
| <b>10 min</b> | 56.3 | 57.9 | 45.7 | 57.4 | 57.4 | 65.4 | 56.3 | 57.5 |
| <b>20 min</b> | 57.3 | 58.3 | 47.6 | 58.6 | 59.0 | 67.5 | 57.9 | 58.4 |
| <b>30 min</b> | 58.3 | 58.5 | 48.5 | 59.4 | 59.6 | 68.8 | 59.2 | 59.1 |
| <b>60 min</b> | 59.0 | 58.9 | 49.0 | 60.0 | 60.6 | 69.8 | 60.2 | 59.7 |

**Table S3.** Crystal data and structure refinement for **Ia ~ d**.

| Compound                                                                                                       | Ia                                                                                            | Ib                                                                                            | Ic                                                                                              | Id                                                                                             |
|----------------------------------------------------------------------------------------------------------------|-----------------------------------------------------------------------------------------------|-----------------------------------------------------------------------------------------------|-------------------------------------------------------------------------------------------------|------------------------------------------------------------------------------------------------|
| Chemical formula                                                                                               | C <sub>80</sub> H <sub>74</sub> N <sub>24</sub> O <sub>2</sub> P <sub>4</sub> Cu <sub>5</sub> | C <sub>87</sub> H <sub>93</sub> N <sub>31</sub> O <sub>5</sub> P <sub>4</sub> Cu <sub>5</sub> | C <sub>81</sub> H <sub>144</sub> N <sub>24</sub> P <sub>4</sub> Cl <sub>6</sub> Cu <sub>5</sub> | C <sub>99</sub> H <sub>113</sub> N <sub>27</sub> P <sub>4</sub> O <sub>4</sub> Cu <sub>5</sub> |
| Formula weight                                                                                                 | 1845.23                                                                                       | 2094.50                                                                                       | 2108.54                                                                                         | 2186.80                                                                                        |
| Crystal system                                                                                                 | Cubic                                                                                         | Triclinic                                                                                     | Orthorhombic                                                                                    | Monoclinic                                                                                     |
| Space group                                                                                                    | <i>Fd-3</i>                                                                                   | <i>P-1</i>                                                                                    | <i>Pnma</i>                                                                                     | <i>P2(1)/n</i>                                                                                 |
| <i>a</i> , Å                                                                                                   | 26.4256(5)                                                                                    | 15.7812(12)                                                                                   | 28.4886(10)                                                                                     | 15.5368(5)                                                                                     |
| <i>b</i> , Å                                                                                                   | 26.4256(5)                                                                                    | 15.9961(11)                                                                                   | 24.7344(10)                                                                                     | 27.8343(8)                                                                                     |
| <i>c</i> , Å                                                                                                   | 26.4256(5)                                                                                    | 21.4010(15)                                                                                   | 16.0647(6)                                                                                      | 23.8490(6)                                                                                     |
| $\alpha$ , deg                                                                                                 | 90                                                                                            | 69.208(2)                                                                                     | 90                                                                                              | 90                                                                                             |
| $\beta$ , deg                                                                                                  | 90                                                                                            | 79.237(3)                                                                                     | 90                                                                                              | 91.8870(10)                                                                                    |
| $\gamma$ , deg                                                                                                 | 90                                                                                            | 67.621(3)                                                                                     | 90                                                                                              | 90                                                                                             |
| <i>V</i> , Å <sup>3</sup>                                                                                      | 18453.3(10)                                                                                   | 4661.9(6)                                                                                     | 11320.0(7)                                                                                      | 10308.0(6)                                                                                     |
| <i>Z</i>                                                                                                       | 8                                                                                             | 2                                                                                             | 4                                                                                               | 4                                                                                              |
| $\rho_{\text{calc}}$ , g/cm <sup>3</sup>                                                                       | 1.282                                                                                         | 1.492                                                                                         | 1.088                                                                                           | 1.256                                                                                          |
| $\mu$ , mm <sup>-1</sup>                                                                                       | 1.255                                                                                         | 1.260                                                                                         | 1.025                                                                                           | 1.129                                                                                          |
| Reflections collected                                                                                          | 4469                                                                                          | 79856                                                                                         | 183255                                                                                          | 93547                                                                                          |
| Independent reflections                                                                                        | 1782                                                                                          | 18119                                                                                         | 10456                                                                                           | 20295                                                                                          |
| <i>R</i> <sub>int</sub>                                                                                        | 0.0248                                                                                        | 0.0680                                                                                        | 0.0517                                                                                          | 0.0471                                                                                         |
| Reflections <i>I</i> > 2 $\sigma$ ( <i>I</i> )                                                                 | 1782                                                                                          | 18119                                                                                         | 10456                                                                                           | 20295                                                                                          |
| Parameters                                                                                                     | 125                                                                                           | 1293                                                                                          | 861                                                                                             | 1170                                                                                           |
| GOF on <i>F</i> <sup>2</sup>                                                                                   | 1.193                                                                                         | 1.013                                                                                         | 1.081                                                                                           | 1.004                                                                                          |
| <i>R</i> <sub>1</sub> <sup>a</sup> / <i>wR</i> <sub>2</sub> <sup>b</sup> ( <i>I</i> > 2 $\sigma$ ( <i>I</i> )) | 0.0394/0.1108                                                                                 | 0.0422/0.0848                                                                                 | 0.0714/0.1765                                                                                   | 0.0406/0.0969                                                                                  |
| <i>R</i> <sub>1</sub> <sup>a</sup> / <i>wR</i> <sub>2</sub> <sup>b</sup> ( <i>all</i> )                        | 0.0504/0.1172                                                                                 | 0.0686/0.0951                                                                                 | 0.0797/0.1823                                                                                   | 0.0613/0.1076                                                                                  |

**Table S4.** Crystal data and structure refinement for **IIa ~ d**.

| Compound                                                                                              | IIa                                                                             | IIb                                                                                           | IIc                                                                                            | II d                                                                                            |
|-------------------------------------------------------------------------------------------------------|---------------------------------------------------------------------------------|-----------------------------------------------------------------------------------------------|------------------------------------------------------------------------------------------------|-------------------------------------------------------------------------------------------------|
| Chemical formula                                                                                      | C <sub>89</sub> H <sub>82</sub> N <sub>20</sub> P <sub>4</sub> OCu <sub>5</sub> | C <sub>85</sub> H <sub>68</sub> N <sub>23</sub> P <sub>4</sub> O <sub>3</sub> Cu <sub>5</sub> | C <sub>96</sub> H <sub>172</sub> N <sub>22</sub> O <sub>4</sub> P <sub>4</sub> Cu <sub>5</sub> | C <sub>101</sub> H <sub>116</sub> N <sub>18</sub> P <sub>4</sub> O <sub>5</sub> Cu <sub>5</sub> |
| Formula weight                                                                                        | 1889.40                                                                         | 1915.33                                                                                       | 2140.13                                                                                        | 2103.79                                                                                         |
| Crystal system                                                                                        | Monoclinic                                                                      | Monoclinic                                                                                    | Orthorhombic                                                                                   | Trigonal                                                                                        |
| Space group                                                                                           | <i>P2(1)/n</i>                                                                  | <i>P2(1)/n</i>                                                                                | <i>Pca2(1)</i>                                                                                 | <i>R-3</i>                                                                                      |
| <i>a</i> , Å                                                                                          | 18.2935(5)                                                                      | 18.2696(5)                                                                                    | 27.5353(6)                                                                                     | 18.7274(4)                                                                                      |
| <i>b</i> , Å                                                                                          | 24.4208(8)                                                                      | 24.0802(6)                                                                                    | 14.4558(3)                                                                                     | 18.7274(4)                                                                                      |
| <i>c</i> , Å                                                                                          | 19.6271(5)                                                                      | 19.5200(6)                                                                                    | 26.8451(7)                                                                                     | 65.400(4)                                                                                       |
| <i>α</i> , deg                                                                                        | 90                                                                              | 90                                                                                            | 90                                                                                             | 90                                                                                              |
| <i>β</i> , deg                                                                                        | 94.0270(10)                                                                     | 95.2510(10)                                                                                   | 90                                                                                             | 90                                                                                              |
| <i>γ</i> , deg                                                                                        | 90                                                                              | 90                                                                                            | 90                                                                                             | 120                                                                                             |
| <i>V</i> , Å <sup>3</sup>                                                                             | 8746.6(4)                                                                       | 8551.5(4)                                                                                     | 10685.6(4)                                                                                     | 19863.9(14)                                                                                     |
| <i>Z</i>                                                                                              | 4                                                                               | 4                                                                                             | 4                                                                                              | 6                                                                                               |
| <i>ρ</i> <sub>calc</sub> , g/cm <sup>3</sup>                                                          | 1.348                                                                           | 1.381                                                                                         | 1.330                                                                                          | 0.975                                                                                           |
| <i>μ</i> , mm <sup>-1</sup>                                                                           | 1.322                                                                           | 1.353                                                                                         | 1.097                                                                                          | 0.878                                                                                           |
| Reflections collected                                                                                 | 17874                                                                           | 97384                                                                                         | 121130                                                                                         | 49453                                                                                           |
| Independent reflections                                                                               | 14834                                                                           | 17502                                                                                         | 19573                                                                                          | 6159                                                                                            |
| <i>R</i> <sub>int</sub>                                                                               | 0.0500                                                                          | 0.0406                                                                                        | 0.0909                                                                                         | 0.0757                                                                                          |
| Reflections <i>I</i> > 2σ( <i>I</i> )                                                                 | 17874                                                                           | 17502                                                                                         | 19573                                                                                          | 6159                                                                                            |
| Parameters                                                                                            | 1154                                                                            | 1196                                                                                          | 1189                                                                                           | 350                                                                                             |
| GOF on <i>F</i> <sup>2</sup>                                                                          | 1.110                                                                           | 1.030                                                                                         | 1.021                                                                                          | 0.998                                                                                           |
| <i>R</i> <sub>1</sub> <sup>a</sup> / <i>wR</i> <sub>2</sub> <sup>b</sup> ( <i>I</i> > 2σ( <i>I</i> )) | 0.0874/0.1898                                                                   | 0.0525/0.1393                                                                                 | 0.0430/ 0.0969                                                                                 | 0.0611/0.1746                                                                                   |
| <i>R</i> <sub>1</sub> <sup>a</sup> / <i>wR</i> <sub>2</sub> <sup>b</sup> ( <i>all</i> )               | 0.1024/0.1978                                                                   | 0.0653/0.1481                                                                                 | 0.0539/ 0.1037                                                                                 | 0.0822/0.1877                                                                                   |

$$^a R_1 = [\sum \text{abs}(\text{abs}(\text{Fo}) - \text{abs}(\text{Fc}))] / [\sum \text{abs}(\text{Fo})].$$

$$^b wR2 = [\sum (w(\text{Fo}^2 - \text{Fc}^2)^2) / \sum (w(\text{Fo}^2)^2)]^{0.5}.$$
